# Supplementary material for: Continental heat storage: Contributions from ground, inland waters, and permafrost thawing
Source: Copernicus journal article supplement (doi:10.5194/esd-2022-32), 2022-08-08
Supplement: Supplementary file 1 [file esd-2022-32-supplement.pdf]

# Supplementary Materials for the manuscript “Continental heat storage: Contributions from ground, inland waters, and permafrost thawing”

Francisco José Cuesta-Valero<sup>1,2</sup>, Hugo Beltrami<sup>3,4</sup>, Almudena García-García<sup>1,2</sup>, Gerhard Krinner<sup>5</sup>, Moritz Langer<sup>6,7</sup>, Andrew H. MacDougall<sup>8</sup>, Jan Nitzbon<sup>6,9</sup>, Jian Peng<sup>1,2</sup>, Karina von Schuckmann<sup>10</sup>, Sonia I. Seneviratne<sup>11</sup>, Noah Smith<sup>12</sup>, Wim Thiery<sup>13</sup>, Inne Vanderkelen<sup>13</sup>, Tonghua Wu<sup>14</sup>

<sup>1</sup>Department of Remote Sensing, Helmholtz Centre for Environmental Research, Leipzig, 04318, Germany.

<sup>2</sup>Remote Sensing Centre for Earth System Research, Leipzig University, 04103, Leipzig, Germany.

<sup>3</sup>Climate & Atmospheric Sciences Institute and Department of Earth Sciences, St. Francis Xavier University, Antigonish, B2G 2W5, Canada.

<sup>4</sup>Département des sciences de la Terre et de l’atmosphère, Université du Québec à Montréal, Montréal, Québec, Canada.

<sup>5</sup>CNRS senior scientist (Directeur de Recherche), LGGE Grenoble, France.

<sup>6</sup>Permafrost Research Section, Alfred Wegener Institute Helmholtz Centre for Polar and Marine Research, Potsdam, Germany.

<sup>7</sup>Geography Department, Humboldt-Universität zu Berlin, Berlin, Germany.

<sup>8</sup>Climate & Environment Program, St. Francis Xavier University Antigonish, Nova Scotia, Canada B2G 2W5.

<sup>9</sup>Paleoclimate Dynamics Section, Alfred Wegener Institute Helmholtz Centre for Polar and Marine Research, Bremerhaven, Germany.

<sup>10</sup>Mercator Ocean International, Toulouse, 31400, France.

<sup>11</sup>Institute for Atmospheric and Climate Science, ETH Zurich, Zurich, 8092, Switzerland.

<sup>12</sup>Department of Mathematics, University of Exeter, Exeter, United Kingdom.

<sup>13</sup>Department of Hydrology and Hydraulic Engineering, Vrije Universiteit Brussel, Brussels, 1050, Belgium.

<sup>14</sup>Cryosphere Research Station on the Qinghai–Tibet Plateau, State Key Laboratory of Cryospheric Science, Northwest Institute of Eco–Environment and Resources (NIEER), Chinese Academy of Sciences (CAS), Lanzhou, 730000, China.

*Correspondence to:* Francisco José Cuesta-Valero (francisco-jose.cuesta-valero@ufz.de)

## S1 Introduction

This file contains supplementary figures accompanying the manuscript “Continental heat storage: Contributions from ground, inland waters, and permafrost thawing”.

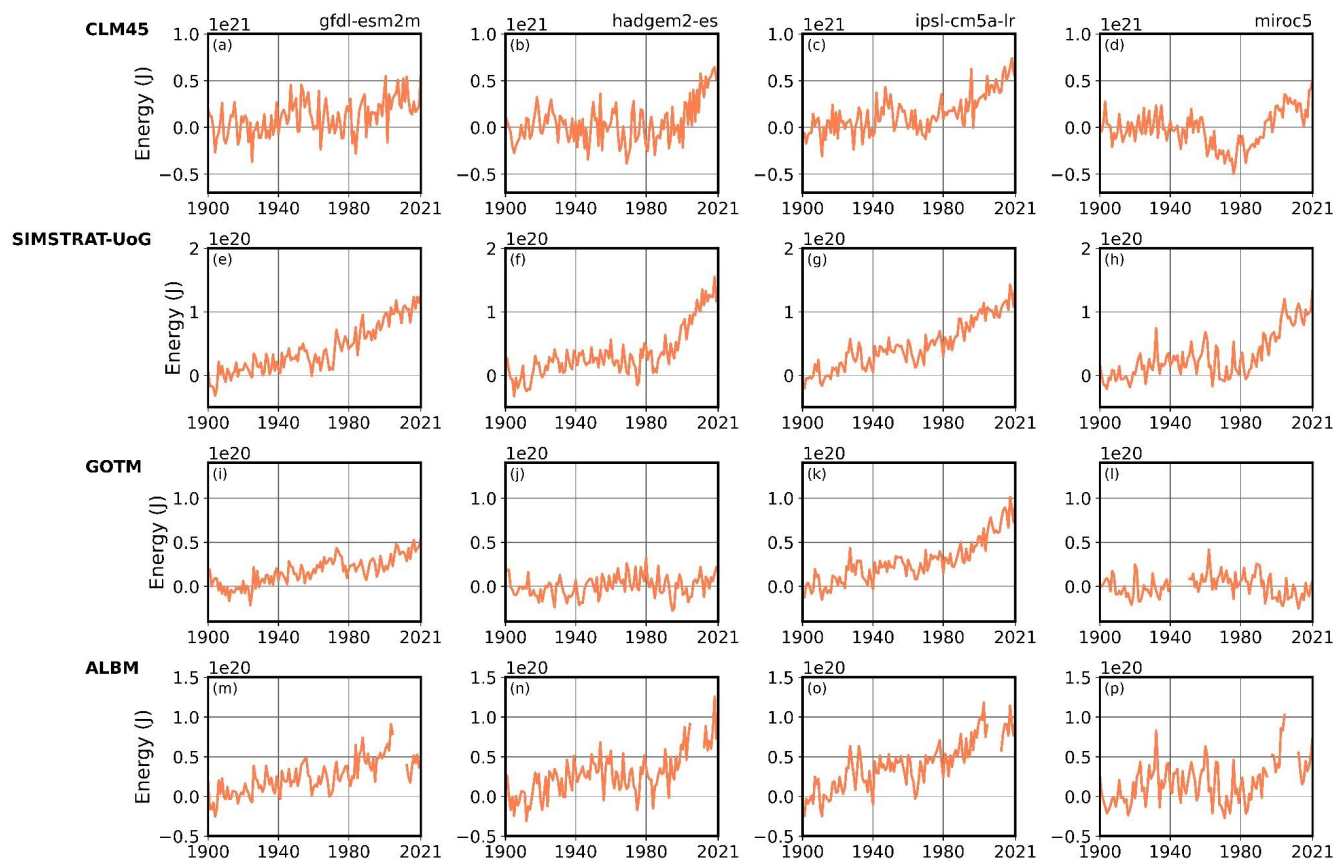

**Figure S1:** Annual heat uptake by natural lakes for the four global lake models (CLM45; a-d, SIMSTRAT-UoG; e-h, ALBM; i-l, GOTM (m-p) and ESM forcings (GFDL-ESM2M, HadGEM2-ES, IPSL-CM5A-LR, MIROC5; columns) calculated compared to the period 1900-1929. For all forcings, the years 2006- 2012 of ALBM are excluded due to model spin up. Additionally, the years 1996-1997 for the ALBM MIROC-5, and 1941-1950 for GOTM MIROC-5 are excluded. Note the different y-axis scales.

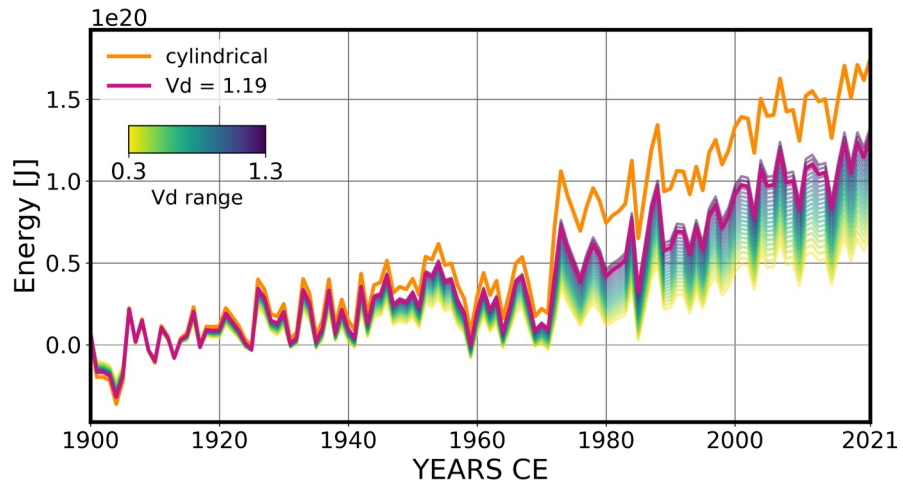

**Figure S2:** Sensitivity of natural lake heat uptake estimates to the global mean lake morphometry parameter  $V_d$ , here shown for the SIMSTRAT-UoG GFDL-ESM2M simulation. The  $V_d$  range of 0.3 to 1.3 is based on observations (Johansson et al., 2007). Cylindrical refers to the cylindrical bathymetry assumption employed in Vanderkelen et al (2020).

## References

- Johansson, H., Brolin, A. A., & Håkanson, L.: New approaches to the modelling of lake basin morphometry. *Environmental Modeling and Assessment*, 12(3), 213–228. <https://doi.org/10.1007/s10666-006-9069-z>, 2007.
- 45 Vanderkelen, I.; van Lipzig, N. P. M.; Lawrence, D. M.; Droppers, B.; Golub, M.; Gosling, S. N.; Janssen, A. B. G.; Marcé, R.; Schmied, H. M.; Perroud, M.; Pierson, D.; Pokhrel, Y.; Satoh, Y.; Schewe, J.; Seneviratne, S. I.; Stepanenko, V. M.; Tan, Z.; Woolway, R. I. & Thiery, W.: Global Heat Uptake by Inland Waters. *Geophysical Research Letters*, 47(12), e2020GL087867, doi:10.1029/2020GL087867, 2020.
